# Supplementary material for: Boundary layer evolution over the central Himalayas from Radio Wind Profiler and Model Simulations
Source: Copernicus journal article supplement (doi:10.5194/acp-2016-101), 2016-04-11
Supplement: Supplementary file [file 3-Supplementary-material.pdf › 3-Supplementary-material.pdf]

## Supplementary Material

### **Boundary layer evolution over the central Himalayas from Radio Wind Profiler and Model Simulations**

**Narendra Singh<sup>1\*</sup>, Raman Solanki<sup>1,2</sup>, N. Ojha<sup>3</sup>, R. H. H. Janssen<sup>3</sup>, A. Pozzer<sup>3</sup> and S. K.  
Dhaka<sup>4</sup>**

<sup>1</sup>Aryabhata Research Institute of Observational Sciences, Nainital, India

<sup>2</sup>Department of Physics and Astrophysics, University of Delhi, India

<sup>3</sup>Department of Atmospheric Chemistry, Max Planck Institute for Chemistry, Mainz,  
Germany

<sup>4</sup>Radio and Atmospheric Physics Lab., Rajdhani College, University of Delhi, India

\*e-mail: [narendra@aries.res.in](mailto:narendra@aries.res.in)

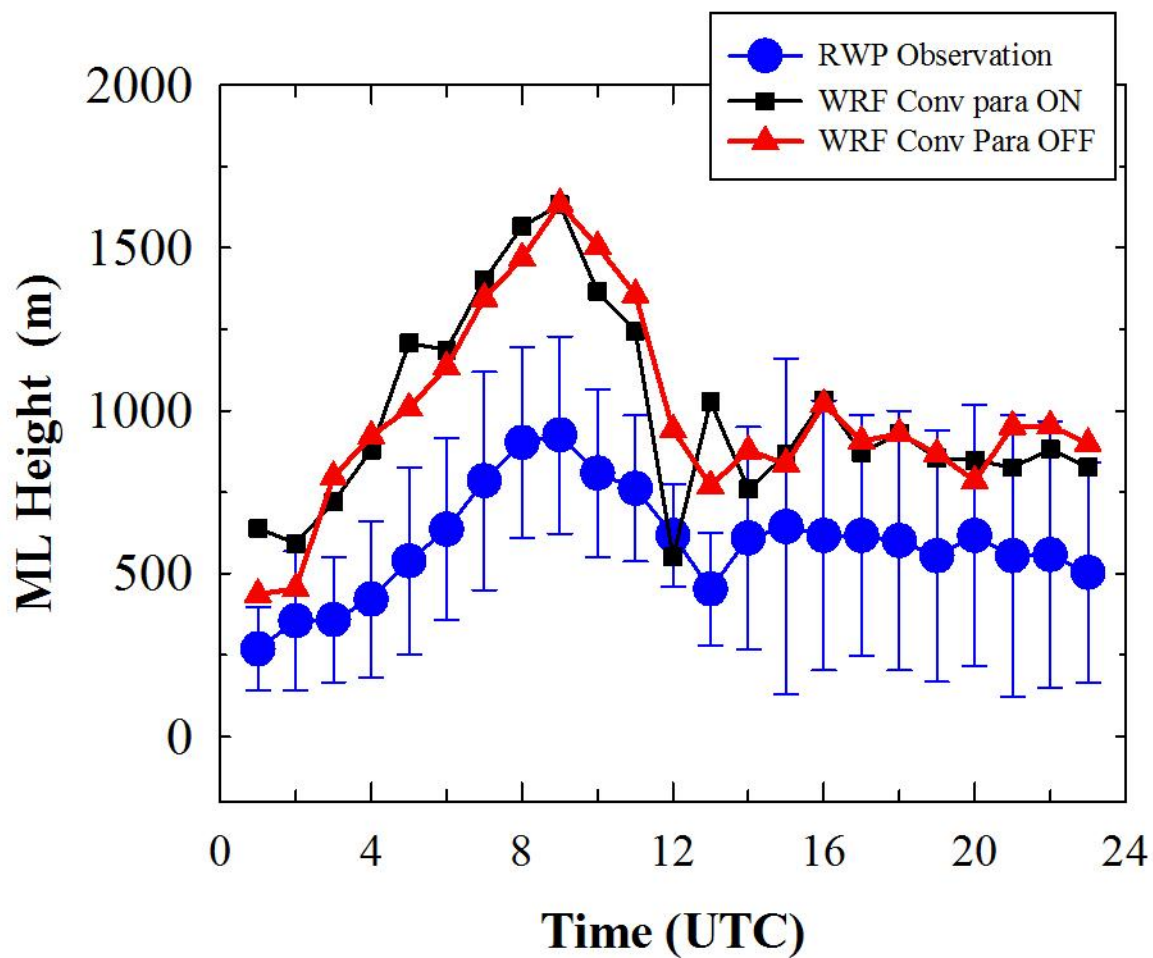

**Figure S1:** Comparison of mean diurnal variation in boundary layer height from the RWP measurements and WRF simulations (5 km x 5 km) to investigate the effect of convective parameterization. The simulation with convective parameterization turned OFF shows relatively smoother variation at 11-13 UT.

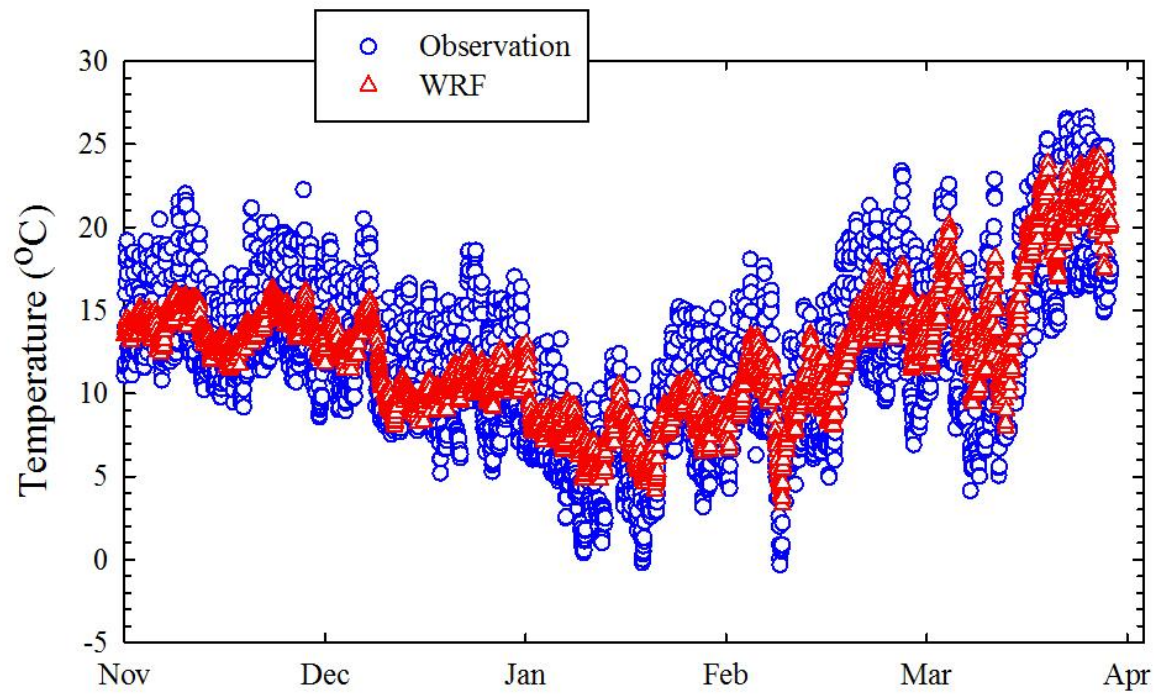

**Figure S2:** Comparison of observed air temperature from Automatic Weather Station (AWS) with WRF simulated temperature at Nainital during study period.

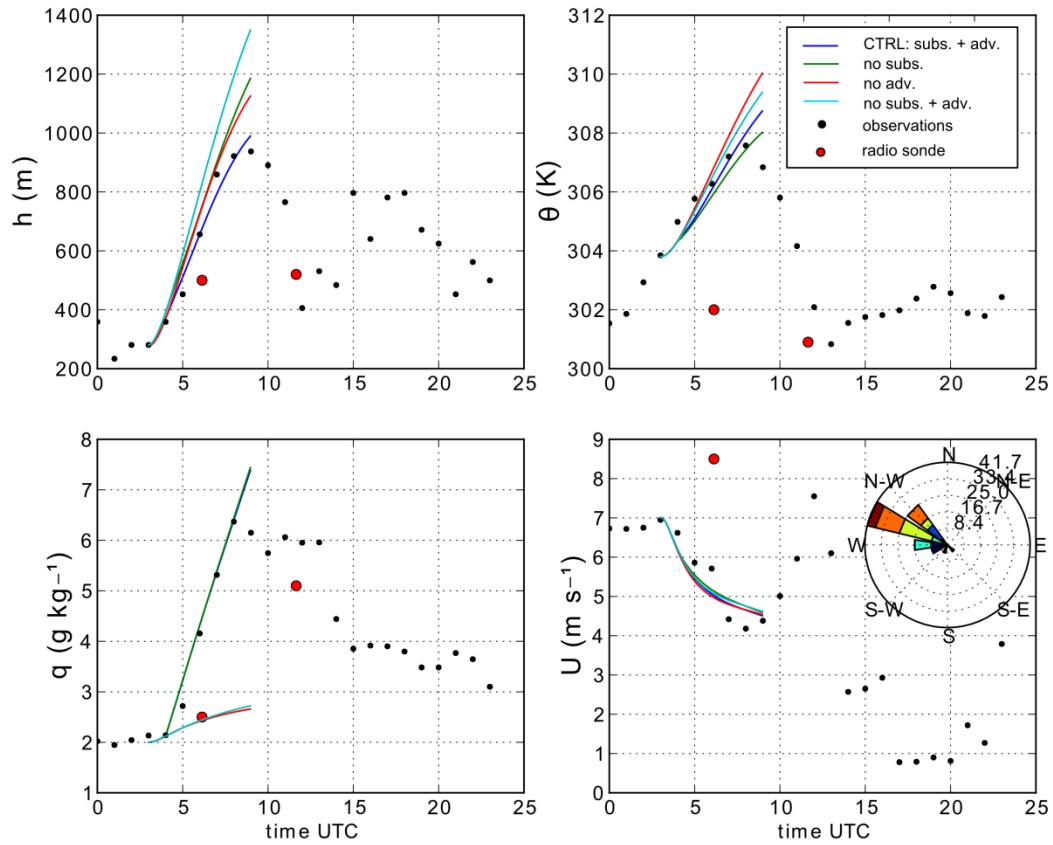

**Figure S3:** Diurnal variations in (a) boundary layer height ( $h$ ), (b) potential temperature ( $\theta$ ) (c) specific humidity ( $q$ ) and (d) wind speed ( $U$ ) and direction on 15<sup>th</sup> March 2012 as simulated with MXL/MESSy. The dots show observations of these variables. The results of four simulations are shown: a control case (CTRL) which includes both subsidence and advection, a simulation in which the subsidence has been turned off (no subs.), a simulation in which the advection of cool and moist air has been turned off (no adv.) and a simulation in which both subsidence and advection have been turned off (no subs. + adv.).
